# Supplementary material for: Spatial Attention Modulates Neuronal Interactions between Simple and Complex Cells in V1
Source: MDPI journal article supplement (doi:10.3390/ijms24098229), 2023-05-04
Supplement: s1 [file s1]

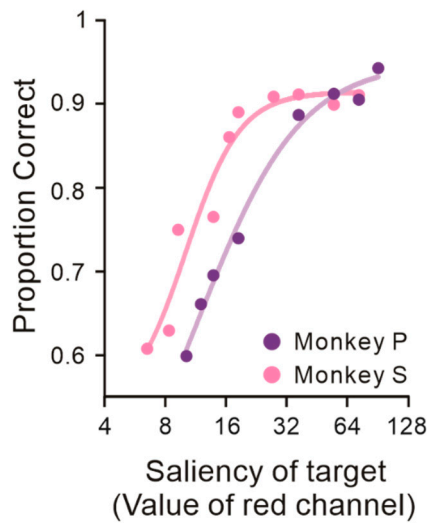

**Supplementary Figure S1.** Performance curves of two macaque monkeys across sessions. Individual points represent the averaged proportion correct at each redness value (monkey P: purple; monkey S: pink). Solid lines represent logistic function fits to the data.

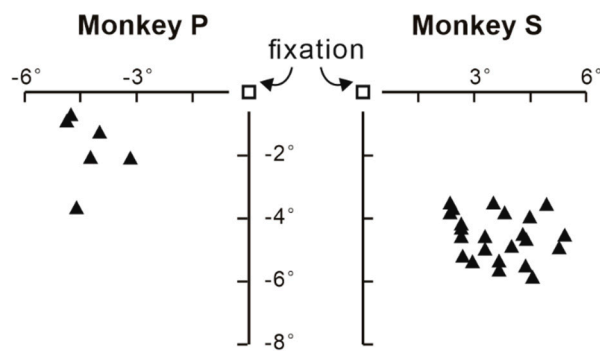

**Supplementary Figure S2.** The position of recorded neurons' RF centers (monkey P: left; monkey S: right) and the fixation point (hollow square).

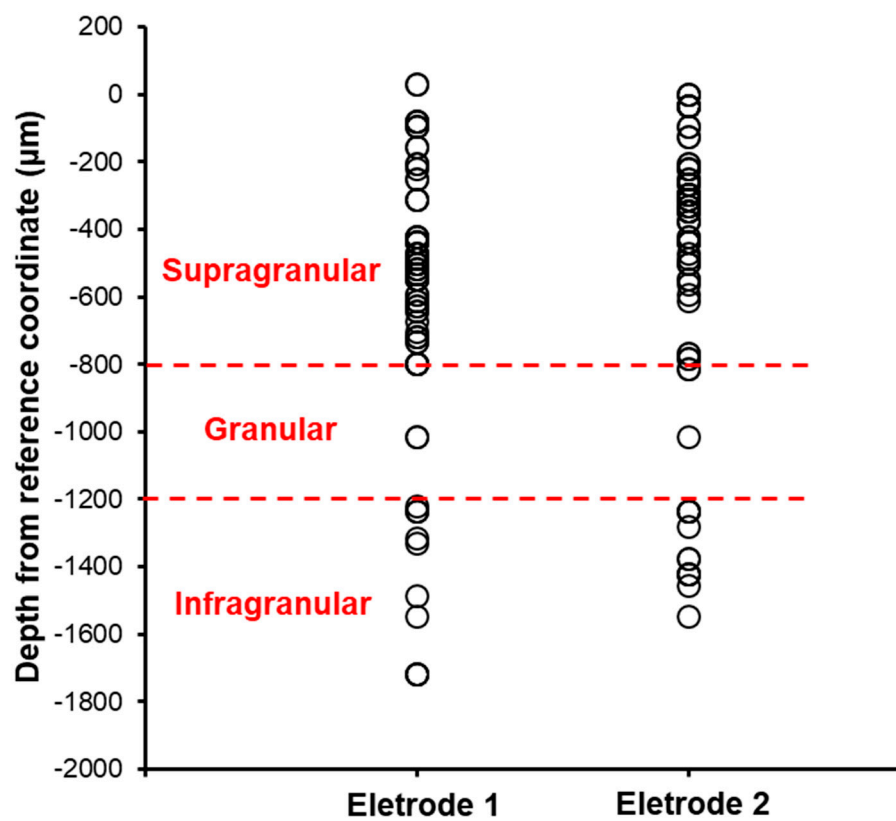

**Supplementary Figure S3.** Recorded neurons' depth from reference coordinate recorded by two electrodes.
